# Supplementary material
Source: PubMed Central journal article supplement (PMC5693618)
Supplement: NIHMS892460-supplement-supplement_1.pdf [file NIHMS892460-supplement-supplement_1.pdf]

**Supplemental Table 1.** Individual Items for the Expanded Prostate Cancer Index Composite Summary Score for Urinary Incontinence

---

1. Over the past 4 weeks, how often have you leaked urine?

- More than once a day..... 1
- About once a day..... 2
- More than once a week..... 3
- About once a week..... 4
- Rarely or never..... 5

2. Which of the following best describes your urinary control during the last 4 weeks?

- No urinary control whatsoever..... 1
- Frequent dribbling..... 2
- Occasional dribbling..... 3
- Total control..... 4

3. How many pads or adult diapers per day did you usually use to control leakage during the last 4 weeks?

- None ..... 0
- 1 pad per day..... 1
- 2 pads per day..... 2
- 3 or more pads per day..... 3

4. How big a problem, if any, has dripping or leaking urine been for you during the last 4 weeks?

- No problem ..... 0

Very small problem..... 1  
Small problem..... 2  
Moderate problem..... 3  
Big problem..... 4

---

Adapted from Wei et al (14). Used with permission.

**Supplemental Table 2.** Characteristics of Patients With Positive Margins at the Bladder Neck

| <b>Patient</b> | <b>Bladder Neck</b> | <b>Pathologic</b>    | <b>Stage</b> | <b>Tumor</b>    | <b>Amount of</b>            |
|----------------|---------------------|----------------------|--------------|-----------------|-----------------------------|
|                | <b>Size, mm</b>     | <b>Gleason Score</b> |              | <b>Location</b> | <b>Prostate Involved, %</b> |
| 1              | 7                   | 4+3                  | pT3a         | Base            | 18.7                        |
| 2              | 5                   | 4+3                  | pT3a         | Base            | 26                          |
| 3              | 15                  | 3+4                  | pT3a         | Base            | 29                          |
